# Supplementary material for: Marine Bacterioplankton Community Dynamics and Potentially Pathogenic Bacteria in Seawater around Jeju Island, South Korea, via Metabarcoding
Source: MDPI journal article supplement (doi:10.3390/ijms241713561), 2023-09-01
Supplement: s1 [file s1]

**Supplementary Table S1.** LEfSe analysis for each seawater. ASVs (relative abundance > 0.1% in at least one sample) between September and others (average value of March, May, December).

| Taxonomic classification                                                                                                                          |      | Months | LDA score<br>(log 10) | p value |
|---------------------------------------------------------------------------------------------------------------------------------------------------|------|--------|-----------------------|---------|
| Bacteria.Bacteroidetes.Flavobacteriia.Flavobacteriales.Crocinitomicaceae.Fluvicola                                                                | 2.92 | Others | 2.90                  | 0.05    |
| Bacteria.Bacteroidetes.Flavobacteriia.Flavobacteriales.Crocinitomicaceae.Fluvicola.Fluvicolahefeinensis                                           | 2.92 | Others | 2.90                  | 0.05    |
| Bacteria.Proteobacteria.Gammaproteobacteria.unclassifiedGammaproteobacteria.unclassifiedGammaproteobacteria.Thiolapillus.Thi<br>olapillusbrandeum | 3.20 | Others | 2.98                  | 0.05    |
| Bacteria.Proteobacteria.Gammaproteobacteria.unclassifiedGammaproteobacteria.unclassifiedGammaproteobacteria.Thiolapillus                          | 3.20 | Others | 3.00                  | 0.05    |
| Bacteria.Proteobacteria.Gammaproteobacteria.unclassifiedGammaproteobacteria                                                                       | 3.20 | Others | 3.00                  | 0.05    |
| Bacteria.Proteobacteria.Gammaproteobacteria.unclassifiedGammaproteobacteria.unclassifiedGammaproteobacteria                                       | 3.20 | Others | 3.01                  | 0.05    |
| Bacteria.Proteobacteria.Gammaproteobacteria.Alteromonadales.Colwelliaceae.Colwellia.Colwelliaaestuarii                                            | 3.00 | Others | 3.04                  | 0.04    |
| Bacteria.Proteobacteria.Gammaproteobacteria.Oceanospirillales.Saccharospirillaceae                                                                | 3.08 | Others | 3.07                  | 0.05    |
| Bacteria.Proteobacteria.Gammaproteobacteria.Oceanospirillales.Saccharospirillaceae.Reinekea.Reinekeaaestuarii                                     | 3.08 | Others | 3.07                  | 0.05    |
| Bacteria.Proteobacteria.Gammaproteobacteria.Oceanospirillales.Saccharospirillaceae.Reinekea                                                       | 3.08 | Others | 3.07                  | 0.05    |
| Bacteria.Proteobacteria.Gammaproteobacteria.Oceanospirillales.Oceanospirillaceae.Neptunomonas.Neptunomonasnaphthovorans                           | 3.31 | Others | 3.11                  | 0.05    |
| Bacteria.Proteobacteria.Gammaproteobacteria.Vibrionales.Vibrionaceae.Vibrio.Vibriosplendidus                                                      | 3.28 | Others | 3.12                  | 0.05    |
| Bacteria.Bacteroidetes.Flavobacteriia.Flavobacteriales.Flavobacteriaceae.Algibacter.Algibacteraestuarii                                           | 3.30 | Others | 3.12                  | 0.04    |
| Bacteria.Proteobacteria.Gammaproteobacteria.Alteromonadales.Alteromonadaceae.Glaciecola.Glaciecolachathamensis                                    | 3.15 | Others | 3.15                  | 0.04    |
| Bacteria.Proteobacteria.Gammaproteobacteria.Alteromonadales.Alteromonadaceae.Glaciecola                                                           | 3.26 | Others | 3.16                  | 0.04    |
| Bacteria.Bacteroidetes.Flavobacteriia.Flavobacteriales.Flavobacteriaceae.Polaribacter.Polaribacterlacunae                                         | 3.51 | Others | 3.16                  | 0.05    |
| Bacteria.Proteobacteria.Alphaproteobacteria.Rhodobacterales.Rhodobacteraceae.Amylibacter.Amylibactercionae                                        | 2.80 | Others | 3.16                  | 0.04    |
| Bacteria.Bacteroidetes.Flavobacteriia.Flavobacteriales.Flavobacteriaceae.Polaribacter.Polaribacteratrinae                                         | 3.58 | Others | 3.25                  | 0.05    |
| Bacteria.Proteobacteria.Alphaproteobacteria.Rhodobacterales.Rhodobacteraceae.Amylibacter                                                          | 3.60 | Others | 3.27                  | 0.05    |
| Bacteria.Bacteroidetes.Flavobacteriia.Flavobacteriales.Flavobacteriaceae.Algibacter                                                               | 3.58 | Others | 3.32                  | 0.04    |
| Bacteria.Proteobacteria.Gammaproteobacteria.Oceanospirillales.Oceanospirillaceae.Oleispira.Oleispiraantarctica                                    | 3.62 | Others | 3.37                  | 0.04    |
| Bacteria.Proteobacteria.Gammaproteobacteria.Oceanospirillales.Oceanospirillaceae.Oleispira                                                        | 3.62 | Others | 3.37                  | 0.04    |
| Bacteria.Proteobacteria.Gammaproteobacteria.Alteromonadales.Colwelliaceae.Colwellia                                                               | 3.69 | Others | 3.46                  | 0.05    |
| Bacteria.Proteobacteria.Gammaproteobacteria.Alteromonadales.Pseudoalteromonadaceae.Pseudoalteromonas.Pseudoalteromonascar<br>rageenovora          | 3.98 | Others | 3.70                  | 0.05    |
| Bacteria.Proteobacteria.Alphaproteobacteria.Rhodobacterales.Rhodobacteraceae.Nereida                                                              | 4.56 | Others | 4.16                  | 0.05    |
| Bacteria.Proteobacteria.Alphaproteobacteria.Rhodobacterales.Rhodobacteraceae.Nereida.Nereidaignava                                                | 4.56 | Others | 4.16                  | 0.05    |
| Bacteria.Proteobacteria.Alphaproteobacteria.Rhodobacterales.Rhodobacteraceae.Lentibacter                                                          | 4.55 | Others | 4.17                  | 0.05    |
| Bacteria.Proteobacteria.Alphaproteobacteria.Rhodobacterales.Rhodobacteraceae.Lentibacter.Lentibacteralgarum                                       | 4.55 | Others | 4.17                  | 0.05    |
| Bacteria.Bacteroidetes                                                                                                                            | 5.11 | Others | 4.52                  | 0.05    |
| Bacteria.Bacteroidetes.Flavobacteriia                                                                                                             | 5.11 | Others | 4.56                  | 0.05    |
| Bacteria.Bacteroidetes.Flavobacteriia.Flavobacteriales.Flavobacteriaceae                                                                          | 5.09 | Others | 4.56                  | 0.05    |
| Bacteria.Bacteroidetes.Flavobacteriia.Flavobacteriales.Flavobacteriaceae.Aurantivirga.Aurantivirgaprofunda                                        | 4.89 | Others | 4.57                  | 0.05    |
| Bacteria.Bacteroidetes.Flavobacteriia.Flavobacteriales.Flavobacteriaceae.Aurantivirga                                                             | 4.89 | Others | 4.57                  | 0.05    |
| Bacteria.Bacteroidetes.Flavobacteriia.Flavobacteriales                                                                                            | 5.11 | Others | 4.57                  | 0.05    |
| Bacteria.Proteobacteria.Gammaproteobacteria.Alteromonadales                                                                                       | 5.34 | Others | 4.80                  | 0.05    |
| Bacteria.Proteobacteria.Gammaproteobacteria.Alteromonadales.Alteromonadaceae.Aestuariibacter                                                      | 5.25 | Others | 4.91                  | 0.05    |

|                                                                                                                                |      |           |      |      |
|--------------------------------------------------------------------------------------------------------------------------------|------|-----------|------|------|
| Bacteria.Proteobacteria.Gammaproteobacteria.Alteromonadales.Alteromonadaceae.Aestuariibacter.Aestuariibacterhalophilus         | 5.25 | Others    | 4.91 | 0.05 |
| Bacteria.Proteobacteria.Gammaproteobacteria.Alteromonadales.Alteromonadaceae                                                   | 5.29 | Others    | 4.93 | 0.05 |
| Bacteria.Proteobacteria.Alphaproteobacteria.Rhodobacterales.Rhodobacteraceae.Ruegeria.Ruegeriaconchae                          | 2.78 | September | 2.75 | 0.01 |
| Bacteria.Proteobacteria.Alphaproteobacteria.Rhodobacterales.Rhodobacteraceae.Roseicyclus.Roseicyclusmahoneyensis               | 2.85 | September | 2.75 | 0.01 |
| Bacteria.Proteobacteria.Alphaproteobacteria.Rhodobacterales.Rhodobacteraceae.Roseicyclus                                       | 2.85 | September | 2.76 | 0.01 |
| Bacteria.Proteobacteria.Gammaproteobacteria.Vibrionales.Vibrionaceae.Vibrio.Vibriooowensii                                     | 2.82 | September | 2.76 | 0.01 |
| Bacteria.Bacteroidetes.Flavobacteriia.Flavobacteriales.Flavobacteriaceae.Mesoflavibacter.Mesoflavibactersabulilitoris          | 2.89 | September | 2.77 | 0.01 |
| Bacteria.Proteobacteria.Gammaproteobacteria.Alteromonadales.Pseudoalteromonadaceae.Pseudoalteromonas.Pseudoalteromonasrubra    | 2.89 | September | 2.81 | 0.02 |
| Bacteria.Proteobacteria.Alphaproteobacteria.Rhodobacterales.Rhodobacteraceae.Roseovarius.Roseovariuscrassostreae               | 2.85 | September | 2.82 | 0.01 |
| Bacteria.Proteobacteria.Gammaproteobacteria.Alteromonadales.Pseudoalteromonadaceae.Pseudoalteromonas.Pseudoalteromonasprofundi | 2.92 | September | 2.82 | 0.01 |
| Bacteria.Proteobacteria.Gammaproteobacteria.Alteromonadales.Pseudoalteromonadaceae.Pseudoalteromonas.Pseudoalteromonasspongiae | 2.82 | September | 2.84 | 0.03 |
| Bacteria.Proteobacteria.Alphaproteobacteria.Sphingomonadales.Erythrobacteraceae.Erythrobacter.Erythrobactergaetbuli            | 2.92 | September | 2.85 | 0.01 |
| Bacteria.Bacteroidetes.Flavobacteriia.Flavobacteriales.Flavobacteriaceae.Mesonina                                              | 3.04 | September | 2.86 | 0.01 |
| Bacteria.Bacteroidetes.Flavobacteriia.Flavobacteriales.Flavobacteriaceae.Mesonina.Mesoniamobilis                               | 3.04 | September | 2.87 | 0.01 |
| Bacteria.Bacteroidetes.Flavobacteriia.Flavobacteriales.Flavobacteriaceae.Muricauda.Muricaudabeolgyonensis                      | 3.30 | September | 2.89 | 0.03 |
| Bacteria.Proteobacteria.Gammaproteobacteria.Vibrionales.Vibrionaceae.Vibrio.Vibrioponticus                                     | 2.92 | September | 2.90 | 0.02 |
| Bacteria.Proteobacteria.Gammaproteobacteria.Vibrionales.Vibrionaceae.Vibrio.Vibrioplantisponsor                                | 2.89 | September | 2.91 | 0.03 |
| Bacteria.Proteobacteria.Gammaproteobacteria.Vibrionales.Vibrionaceae.Vibrio.Vibriocampbellii                                   | 3.14 | September | 2.92 | 0.03 |
| Bacteria.Proteobacteria.Alphaproteobacteria.Rhodobacterales.Rhodobacteraceae.Citricella                                        | 3.14 | September | 2.93 | 0.01 |
| Bacteria.Proteobacteria.Alphaproteobacteria.Sphingomonadales.Erythrobacteraceae.Erythrobacter.Erythrobacterlutimaris           | 3.08 | September | 2.93 | 0.01 |
| Bacteria.Proteobacteria.Gammaproteobacteria.Pseudomonadales.Moraxellaceae.Psychrobacter.Psychrobactermarincola                 | 3.06 | September | 2.93 | 0.01 |
| Bacteria.Proteobacteria.Alphaproteobacteria.Rhodobacterales.Rhodobacteraceae.Paracoccus.Paracoccus uc                          | 3.17 | September | 2.93 | 0.03 |
| Bacteria.Bacteroidetes.Flavobacteriia.Flavobacteriales.Flavobacteriaceae.Muricauda                                             | 3.30 | September | 2.93 | 0.03 |
| Bacteria.Bacteroidetes.Flavobacteriia.Flavobacteriales.Flavobacteriaceae.Bizionia.Bizioniahallyeonensis                        | 3.08 | September | 2.94 | 0.01 |
| Bacteria.Proteobacteria.Alphaproteobacteria.Rhodobacterales.Rhodobacteraceae.Citricella.Citricellalthiooxidans                 | 3.14 | September | 2.94 | 0.01 |
| Bacteria.Proteobacteria.Alphaproteobacteria.Rhizobiales.Hyphomicrobiaceae.Devosia                                              | 3.41 | September | 2.95 | 0.05 |
| Bacteria.Proteobacteria.Gammaproteobacteria.Alteromonadales.Colwelliaceae.Thalassotalea.Thalassotalealoyana                    | 3.28 | September | 2.96 | 0.04 |
| Bacteria.Proteobacteria.Alphaproteobacteria.Rhizobiales.Hyphomicrobiaceae.Devosia.Devosialimi                                  | 3.41 | September | 2.97 | 0.05 |
| Bacteria.Proteobacteria.Alphaproteobacteria.Rhodobacterales.Rhodobacteraceae.Pelagibaca.Pelagibacabermudensis                  | 3.17 | September | 2.99 | 0.01 |
| Bacteria.Bacteroidetes.Flavobacteriia.Flavobacteriales.Flavobacteriaceae.Dokdonia.Dokdonialutea                                | 3.12 | September | 2.99 | 0.03 |
| Bacteria.Proteobacteria.Alphaproteobacteria.Kiloniellales.Kiloniellaceae.Kiloniella.Kiloniellalitenaei                         | 3.30 | September | 2.99 | 0.05 |
| Bacteria.Proteobacteria.Alphaproteobacteria.Rhodobacterales.Rhodobacteraceae.Rhodobacter.Rhodobactercapsulatus                 | 3.26 | September | 3.00 | 0.01 |
| Bacteria.Bacteroidetes.Flavobacteriia.Flavobacteriales.Flavobacteriaceae.Dokdonia                                              | 3.12 | September | 3.00 | 0.03 |
| Bacteria.Proteobacteria.Alphaproteobacteria.Kiloniellales.Kiloniellaceae                                                       | 3.30 | September | 3.01 | 0.05 |
| Bacteria.Proteobacteria.Alphaproteobacteria.Kiloniellales.Kiloniellaceae.Kiloniella                                            | 3.30 | September | 3.01 | 0.05 |
| Bacteria.Proteobacteria.Alphaproteobacteria.Kiloniellales                                                                      | 3.30 | September | 3.01 | 0.05 |
| Bacteria.Proteobacteria.Gammaproteobacteria.Vibrionales.Vibrionaceae.Vibrio.Vibrioxuui                                         | 3.27 | September | 3.02 | 0.01 |
| Bacteria.Proteobacteria.Gammaproteobacteria.Vibrionales.Vibrionaceae.Vibrio.Vibriofortis                                       | 3.30 | September | 3.04 | 0.02 |
| Bacteria.Proteobacteria.Alphaproteobacteria.Rhodobacterales.Rhodobacteraceae.Sulfitobacter.Sulfitobacterdubius                 | 3.28 | September | 3.04 | 0.04 |
| Bacteria.Proteobacteria.Gammaproteobacteria.Vibrionales.Vibrionaceae.Vibrio.Vibriocommunis                                     | 3.06 | September | 3.05 | 0.01 |
| Bacteria.Proteobacteria.Alphaproteobacteria.Rhodobacterales.Rhodobacteraceae.Oceanicola.Oceanicolalitoreus                     | 3.16 | September | 3.05 | 0.01 |
| Bacteria.Bacteroidetes.Flavobacteriia.Flavobacteriales.Flavobacteriaceae.Hyunsoonlella                                         | 3.06 | September | 3.06 | 0.04 |
| Bacteria.Proteobacteria.Alphaproteobacteria.Rhizobiales.Cohaesibacteraceae.Cohaesibacter.Cohaesibactermarisflavi               | 3.37 | September | 3.06 | 0.01 |

|                                                                                                                                     |      |           |      |      |
|-------------------------------------------------------------------------------------------------------------------------------------|------|-----------|------|------|
| Bacteria.Proteobacteria.Gammaproteobacteria.Alteromonadales.Colwelliaceae.Thalassotalea.Thalassotaleafusca                          | 3.34 | September | 3.07 | 0.04 |
| Bacteria.Proteobacteria.Alphaproteobacteria.Rhodobacterales.Rhodobacteraceae.Oceanicola                                             | 3.38 | September | 3.08 | 0.04 |
| Bacteria.Proteobacteria.Alphaproteobacteria.Rhodobacterales.Rhodobacteraceae.Nioella.Nioellaestuarii                                | 3.10 | September | 3.08 | 0.02 |
| Bacteria.Bacteroidetes.Flavobacteriia.Flavobacteriales.Flavobacteriaceae.Gilvibacter                                                | 3.35 | September | 3.08 | 0.01 |
| Bacteria.Proteobacteria.Alphaproteobacteria.Sphingomonadales.Erythrobacteraceae.Altererythrobacter.Altererythrobacterishigakiensis  | 3.34 | September | 3.09 | 0.01 |
| Bacteria.Bacteroidetes.Flavobacteriia.Flavobacteriales.Flavobacteriaceae.Salinimicrobium.Salinimicrobiumsoli                        | 3.33 | September | 3.09 | 0.01 |
| Bacteria.Proteobacteria.Gammaproteobacteria.Alteromonadales.Pseudoalteromonadaceae.Pseudoalteromonas.Pseudoalteromonasprydzensis    | 3.30 | September | 3.09 | 0.02 |
| Bacteria.Bacteroidetes.Flavobacteriia.Flavobacteriales.Flavobacteriaceae.Hyunsoonleella.Hyunsoonleellaudonensis                     | 3.06 | September | 3.09 | 0.04 |
| Bacteria.Bacteroidetes.Flavobacteriia.Flavobacteriales.Flavobacteriaceae.Salinimicrobium                                            | 3.33 | September | 3.10 | 0.01 |
| Bacteria.Bacteroidetes.Flavobacteriia.Flavobacteriales.Flavobacteriaceae.Gilvibacter.Gilvibactersediminis                           | 3.35 | September | 3.10 | 0.01 |
| Bacteria.Proteobacteria.Alphaproteobacteria.Rhodobacterales.Rhodobacteraceae.Nioella                                                | 3.10 | September | 3.11 | 0.02 |
| Bacteria.Proteobacteria.Alphaproteobacteria.Rhizobiales.Hyphomicrobiaceae                                                           | 3.66 | September | 3.11 | 0.05 |
| Bacteria.Proteobacteria.Alphaproteobacteria.Sphingomonadales.Erythrobacteraceae.Altererythrobacter                                  | 3.34 | September | 3.12 | 0.01 |
| Bacteria.Proteobacteria.Gammaproteobacteria.Vibrionales.Vibrionaceae.Vibrio.Vibriopelagius                                          | 3.42 | September | 3.12 | 0.01 |
| Bacteria.Bacteroidetes.Flavobacteriia.Flavobacteriales.Crocinitomicaceae.Salinirepens.Salinirepensamamiensis                        | 3.40 | September | 3.13 | 0.05 |
| Bacteria.Bacteroidetes.Flavobacteriia.Flavobacteriales.Flavobacteriaceae.Mesoflavibacter.Mesoflavibacterzeaxanthinifaciens          | 3.45 | September | 3.14 | 0.01 |
| Bacteria.Bacteroidetes.Flavobacteriia.Flavobacteriales.Flavobacteriaceae.Pseudotenacibaculum                                        | 3.33 | September | 3.14 | 0.01 |
| Bacteria.Bacteroidetes.Flavobacteriia.Flavobacteriales.Crocinitomicaceae.Salinirepens                                               | 3.40 | September | 3.14 | 0.05 |
| Bacteria.Bacteroidetes.Flavobacteriia.Flavobacteriales.Flavobacteriaceae.Pseudotenacibaculum.Pseudotenacibaculumhaliotis            | 3.33 | September | 3.14 | 0.01 |
| Bacteria.Proteobacteria.Alphaproteobacteria.Rhodobacterales.Rhodobacteraceae.Celeribacter.Celeribactermanganoxidans                 | 3.00 | September | 3.15 | 0.02 |
| Bacteria.Proteobacteria.Alphaproteobacteria.Rhodobacterales.Rhodobacteraceae.Donghicola.Donghicolatyrosinivorans                    | 3.47 | September | 3.17 | 0.02 |
| Bacteria.Proteobacteria.Alphaproteobacteria.Sphingomonadales.Erythrobacteraceae.Erythrobacter.Erythrobactercitreus                  | 3.39 | September | 3.17 | 0.01 |
| Bacteria.Proteobacteria.Alphaproteobacteria.Rhizobiales.Cohaesibacteraceae.Cohaesibacter                                            | 3.53 | September | 3.18 | 0.02 |
| Bacteria.Proteobacteria.Alphaproteobacteria.Rhodospirillales.Rhodospirillaceae.Thalassospira                                        | 3.56 | September | 3.19 | 0.02 |
| Bacteria.Bacteroidetes.Flavobacteriia.Flavobacteriales.Flavobacteriaceae.Croceitalea.Croceitaleaackloniae                           | 3.14 | September | 3.19 | 0.02 |
| Bacteria.Bacteroidetes.Flavobacteriia.Flavobacteriales.Flavobacteriaceae.Croceitalea                                                | 3.14 | September | 3.20 | 0.02 |
| Bacteria.Proteobacteria.Alphaproteobacteria.Rhizobiales.Cohaesibacteraceae                                                          | 3.53 | September | 3.21 | 0.02 |
| Bacteria.Proteobacteria.Alphaproteobacteria.Rhodospirillales.Rhodospirillaceae.Thalassospira.Thalassospirapidiphila                 | 3.56 | September | 3.22 | 0.02 |
| Bacteria.Proteobacteria.Gammaproteobacteria.Alteromonadales.Pseudoalteromonadaceae.Pseudoalteromonas.Pseudoalteromonasluteoviolacea | 3.54 | September | 3.22 | 0.05 |
| Bacteria.Proteobacteria.Alphaproteobacteria.Rhodobacterales.Rhodobacteraceae.Marivita.Marivitabyunsanensis                          | 3.26 | September | 3.22 | 0.04 |
| Bacteria.Proteobacteria.Alphaproteobacteria.Rhodobacterales.Rhodobacteraceae.Pelagibaca.Pelagibacaabyssi                            | 3.47 | September | 3.24 | 0.02 |
| Bacteria.Bacteroidetes.Flavobacteriia.Flavobacteriales.Flavobacteriaceae.Mesoflavibacter                                            | 3.55 | September | 3.25 | 0.01 |
| Bacteria.Proteobacteria.Gammaproteobacteria.Vibrionales.Vibrionaceae.Vibrio.Vibriomaritimus                                         | 3.56 | September | 3.25 | 0.02 |
| Bacteria.Cyanobacteria.Cyanophyceae.Synechococcales.Prochloraceae                                                                   | 3.54 | September | 3.27 | 0.02 |
| Bacteria.Cyanobacteria.Cyanophyceae.Synechococcales.Prochloraceae.Prochlorococcus.Prochlorococcusmarinus                            | 3.54 | September | 3.27 | 0.02 |
| Bacteria.Proteobacteria.Alphaproteobacteria.Rhodospirillales.Rhodospirillaceae                                                      | 3.76 | September | 3.29 | 0.05 |
| Bacteria.Proteobacteria.Gammaproteobacteria.Cellvibrionales.Haliaceae.Luminiphilus                                                  | 3.57 | September | 3.30 | 0.05 |
| Bacteria.Cyanobacteria.Cyanophyceae.Synechococcales.Prochloraceae.Prochlorococcus                                                   | 3.54 | September | 3.30 | 0.02 |
| Bacteria.Proteobacteria.Alphaproteobacteria.Rhodospirillales                                                                        | 3.76 | September | 3.31 | 0.05 |
| Bacteria.Proteobacteria.Alphaproteobacteria.Rhodobacterales.Rhodobacteraceae.Rhodobacter                                            | 3.54 | September | 3.31 | 0.01 |
| Bacteria.Bacteroidetes.Flavobacteriia.Flavobacteriales.Flavobacteriaceae.Formosa                                                    | 3.69 | September | 3.32 | 0.05 |
| Bacteria.Proteobacteria.Alphaproteobacteria.Rhodobacterales.Rhodobacteraceae.Ahrensia.Ahrensiakielensis                             | 3.62 | September | 3.32 | 0.04 |
| Bacteria.Proteobacteria.Alphaproteobacteria.Rhodobacterales.Rhodobacteraceae.Ahrensia                                               | 3.62 | September | 3.34 | 0.04 |

|                                                                                                                                        |      |           |      |      |
|----------------------------------------------------------------------------------------------------------------------------------------|------|-----------|------|------|
| Bacteria.Bacteroidetes.Saprospira.Saprospirales.Haliscomenobacteraceae.Phaeodactylibacter.Phaeodactylibacterxiamenensis                | 3.58 | September | 3.34 | 0.02 |
| Bacteria.Bacteroidetes.Saprospira.Saprospirales.Haliscomenobacteraceae.Phaeodactylibacter                                              | 3.58 | September | 3.35 | 0.02 |
| Bacteria.Bacteroidetes.Flavobacteriia.Flavobacteriales.Flavobacteriaceae.Formosa.Formosaalgae                                          | 3.69 | September | 3.36 | 0.05 |
| Bacteria.Proteobacteria.Gammaproteobacteria.Cellvibrionales.Haliaceae.Luminiphilus.Luminiphilussyltensis                               | 3.57 | September | 3.36 | 0.05 |
| Bacteria.Proteobacteria.Alphaproteobacteria.Rhodobacterales.Rhodobacteraceae.Pelagibaca                                                | 3.65 | September | 3.36 | 0.02 |
| Bacteria.Proteobacteria.Gammaproteobacteria.Pseudomonadales.Moraxellaceae.Psychrobacter.Psychrobacterceler                             | 3.63 | September | 3.36 | 0.03 |
| Bacteria.Proteobacteria.Gammaproteobacteria.Vibrionales.Vibrionaceae.Vibrio.Vibriurumoiensis                                           | 3.76 | September | 3.38 | 0.05 |
| Bacteria.Proteobacteria.Alphaproteobacteria.Rhodobacterales.Rhodobacteraceae.Shimia.Shimiaisoporae                                     | 3.99 | September | 3.38 | 0.05 |
| Bacteria.Proteobacteria.Alphaproteobacteria.Rhodobacterales.Rhodobacteraceae.Yangia                                                    | 3.65 | September | 3.39 | 0.01 |
| Bacteria.Bacteroidetes.Saprospira                                                                                                      | 3.58 | September | 3.39 | 0.02 |
| Bacteria.Proteobacteria.Alphaproteobacteria.Rhodobacterales.Rhodobacteraceae.Shimia                                                    | 3.99 | September | 3.39 | 0.05 |
| Bacteria.Proteobacteria.Alphaproteobacteria.Rhodobacterales.Rhodobacteraceae.Yangia.Yangiapacifica                                     | 3.65 | September | 3.39 | 0.01 |
| Bacteria.Proteobacteria.Gammaproteobacteria.Alteromonadales.Pseudoalteromonadaceae.Pseudoalteromonas.Pseudoalteromonasarc<br>tica      | 3.75 | September | 3.40 | 0.04 |
| Bacteria.Proteobacteria.Gammaproteobacteria.Alteromonadales.Colwelliaceae.Thalassotalea                                                | 3.62 | September | 3.44 | 0.05 |
| Bacteria.Proteobacteria.Alphaproteobacteria.Rhodobacterales.Rhodobacteraceae.Celeribacter.Celeribacterbaekdonensis                     | 3.76 | September | 3.46 | 0.04 |
| Bacteria.Proteobacteria.Gammaproteobacteria.Pseudomonadales.Moraxellaceae                                                              | 3.74 | September | 3.48 | 0.03 |
| Bacteria.Proteobacteria.Alphaproteobacteria.Sphingomonadales.Erythrobacteraceae.Erythrobacter.Erythrobacterseohaensis                  | 3.78 | September | 3.51 | 0.02 |
| Bacteria.Proteobacteria.Alphaproteobacteria.Rhodobacterales.Rhodobacteraceae.Celeribacter                                              | 3.88 | September | 3.51 | 0.04 |
| Bacteria.Proteobacteria.Alphaproteobacteria.Rhodobacterales.Rhodobacteraceae.Aestuariicoccus                                           | 3.81 | September | 3.52 | 0.02 |
| Bacteria.Proteobacteria.Alphaproteobacteria.Rhodobacterales.Rhodobacteraceae.Leisingera.Leisingeracaerulea                             | 4.07 | September | 3.53 | 0.05 |
| Bacteria.Proteobacteria.Alphaproteobacteria.Rhodobacterales.Rhodobacteraceae.Nautella                                                  | 3.90 | September | 3.56 | 0.05 |
| Bacteria.Proteobacteria.Alphaproteobacteria.Rhodobacterales.Rhodobacteraceae.Nautella.Nautellaitalica                                  | 3.90 | September | 3.57 | 0.05 |
| Bacteria.Proteobacteria.Alphaproteobacteria.Rhodobacterales.Rhodobacteraceae.Aestuariicoccus.Aestuariicoccusmarinus                    | 3.81 | September | 3.61 | 0.02 |
| Bacteria.Proteobacteria.Gammaproteobacteria.Vibrionales.Vibrionaceae.Vibrio.Vibriotasmaniensis                                         | 3.94 | September | 3.62 | 0.05 |
| Bacteria.Proteobacteria.Gammaproteobacteria.Vibrionales.Vibrionaceae.Vibrio.Vibriochagasii                                             | 3.98 | September | 3.63 | 0.05 |
| Bacteria.Proteobacteria.Gammaproteobacteria.Alteromonadales.Pseudoalteromonadaceae.Pseudoalteromonas.Pseudoalteromonasnig<br>rifaciens | 4.02 | September | 3.66 | 0.05 |
| Bacteria.Proteobacteria.Gammaproteobacteria.Pseudomonadales.Moraxellaceae.Psychrobacter                                                | 3.74 | September | 3.67 | 0.03 |
| Bacteria.Proteobacteria.Alphaproteobacteria.Rhodobacterales.Rhodobacteraceae.Donghicola.Donghicolaeburneus                             | 3.97 | September | 3.67 | 0.02 |
| Bacteria.Proteobacteria.Gammaproteobacteria.Pseudomonadales                                                                            | 3.74 | September | 3.67 | 0.03 |
| Bacteria.Bacteroidetes.Saprospira.Saprospirales.Haliscomenobacteraceae                                                                 | 3.58 | September | 3.70 | 0.02 |
| Bacteria.Bacteroidetes.Saprospira.Saprospirales                                                                                        | 3.58 | September | 3.71 | 0.02 |
| Bacteria.Proteobacteria.Gammaproteobacteria.Alteromonadales.Pseudoalteromonadaceae.Pseudoalteromonas.Pseudoalteromonasag<br>arivorans  | 4.11 | September | 3.74 | 0.05 |
| Bacteria.Proteobacteria.Alphaproteobacteria.Sphingomonadales.Erythrobacteraceae.Erythrobacter.Erythrobacterflavus                      | 4.05 | September | 3.75 | 0.02 |
| Bacteria.Proteobacteria.Alphaproteobacteria.Rhodobacterales.Rhodobacteraceae.Donghicola                                                | 4.09 | September | 3.76 | 0.03 |
| Bacteria.Proteobacteria.Gammaproteobacteria.Alteromonadales.Pseudoalteromonadaceae.Pseudoalteromonas.Pseudoalteromonasara<br>biensis   | 4.06 | September | 3.79 | 0.02 |
| Bacteria.Proteobacteria.Gammaproteobacteria.Vibrionales.Vibrionaceae.Vibrio.Vibrioshilonii                                             | 4.08 | September | 3.79 | 0.02 |
| Bacteria.Proteobacteria.Alphaproteobacteria.Rhodobacterales.Rhodobacteraceae.Marivita.Marivitageojedonensis                            | 4.22 | September | 3.81 | 0.05 |
| Bacteria.Proteobacteria.Alphaproteobacteria.Rhodobacterales.Rhodobacteraceae.Marivita                                                  | 4.26 | September | 3.87 | 0.05 |
| Bacteria.Proteobacteria.Alphaproteobacteria.Rhodobacterales.Rhodobacteraceae.Phaeobacter.Phaeobacteritalicus                           | 4.25 | September | 3.90 | 0.05 |
| Bacteria.Proteobacteria.Gammaproteobacteria.Alteromonadales.Pseudoalteromonadaceae.Pseudoalteromonas.Pseudoalteromonastetr<br>aodonis  | 4.25 | September | 3.93 | 0.05 |
| Bacteria.Proteobacteria.Gammaproteobacteria.Vibrionales.Vibrionaceae.Vibrio.Vibriokanaloe                                              | 4.26 | September | 3.94 | 0.04 |

|                                                                                                                            |      |           |      |      |
|----------------------------------------------------------------------------------------------------------------------------|------|-----------|------|------|
| Bacteria.Cyanobacteria.Cyanophyceae.Synechococcales.Synechococcaceae.Synechococcus.Synechococcusrubescens                  | 4.55 | September | 4.05 | 0.05 |
| Bacteria.Proteobacteria.Alphaproteobacteria.Sphingomonadales.Erythrobacteraceae.Erythrobacter                              | 4.33 | September | 4.06 | 0.02 |
| Bacteria.Cyanobacteria.Cyanophyceae.Synechococcales.Synechococcaceae                                                       | 4.55 | September | 4.12 | 0.05 |
| Bacteria.Cyanobacteria.Cyanophyceae.Synechococcales.Synechococcaceae.Synechococcus                                         | 4.55 | September | 4.14 | 0.05 |
| Bacteria.Cyanobacteria.Cyanophyceae                                                                                        | 4.59 | September | 4.16 | 0.05 |
| Bacteria.Cyanobacteria                                                                                                     | 4.59 | September | 4.16 | 0.05 |
| Bacteria.Proteobacteria.Alphaproteobacteria.Rhodobacterales.Rhodobacteraceae.Marivivens.Marivivensdonghaensis              | 4.49 | September | 4.18 | 0.01 |
| Bacteria.Cyanobacteria.Cyanophyceae.Synechococcales                                                                        | 4.59 | September | 4.20 | 0.05 |
| Bacteria.Proteobacteria.Alphaproteobacteria.Rhodobacterales.Rhodobacteraceae.Marivivens                                    | 4.49 | September | 4.21 | 0.01 |
| Bacteria.Proteobacteria.Gammaproteobacteria.Alteromonadales.Pseudoalteromonadaceae                                         | 4.84 | September | 4.36 | 0.05 |
| Bacteria.Proteobacteria.Gammaproteobacteria.Alteromonadales.Pseudoalteromonadaceae.Pseudoalteromonas                       | 4.83 | September | 4.37 | 0.05 |
| Bacteria.Proteobacteria.Alphaproteobacteria.Sphingomonadales.Erythrobacteraceae.Citromicrobium.Citromicrobiumbathyomarinum | 4.83 | September | 4.52 | 0.01 |
| Bacteria.Proteobacteria.Alphaproteobacteria.Sphingomonadales.Erythrobacteraceae.Citromicrobium                             | 4.83 | September | 4.54 | 0.01 |
| Bacteria.Proteobacteria.Alphaproteobacteria.Sphingomonadales                                                               | 4.97 | September | 4.68 | 0.05 |
| Bacteria.Proteobacteria.Alphaproteobacteria.Sphingomonadales.Erythrobacteraceae                                            | 4.96 | September | 4.68 | 0.02 |

**Supplementary Table S2.** Summary of potential pathogenic bacteria and their hosts.

| Class                 | Species                               | Host                                                                                                             | Reference |
|-----------------------|---------------------------------------|------------------------------------------------------------------------------------------------------------------|-----------|
| Betaproteobacteria    | <i>Comamonas testosteroni</i>         |                                                                                                                  | [1]       |
| Epsilonproteobacteria | <i>Arcobacter cryaerophilus</i>       | human, terrestrial animal (poultry, porcine, bovine, sheep feces), clams                                         | [2-4]     |
| Flavobacteriia        | <i>Formosa algae</i>                  | macroalgae                                                                                                       | [5]       |
| Flavobacteriia        | <i>Tenacibaculum discolor</i>         |                                                                                                                  | [6]       |
| Flavobacteriia        | <i>Tenacibaculum soleae</i>           | fish ( <i>Trachurus trachurus</i> )                                                                              | [7]       |
| Gammaproteobacteria   | <i>Acinetobacter johnsonii</i>        | human; fish (rainbow trout)                                                                                      | [8, 9]    |
| Gammaproteobacteria   | <i>Acinetobacter venetianus</i>       | whiteleg shrimp                                                                                                  | [10]      |
| Gammaproteobacteria   | <i>Aeromonas hydrophila</i>           |                                                                                                                  | [11]      |
| Gammaproteobacteria   | <i>Coxiella burnetii</i>              | human                                                                                                            | [12]      |
| Gammaproteobacteria   | <i>Moritella viscosa</i>              | fish (salmonid)                                                                                                  | [13]      |
| Gammaproteobacteria   | <i>Photobacterium damsela</i>         |                                                                                                                  | [14]      |
| Gammaproteobacteria   | <i>Photobacterium iliopiscarium</i>   | fish                                                                                                             | [15]      |
| Gammaproteobacteria   | <i>Photobacterium rosenbergii</i>     | sponges                                                                                                          | [15]      |
| Gammaproteobacteria   | <i>Photobacterium swingsii</i>        | fish (torafugu), octopus ( <i>Octopus vulgaris</i> )                                                             | [16]      |
| Gammaproteobacteria   | <i>Pseudoalteromonas arctica</i>      | red alga ( <i>Agarophyton vermiculophyllum</i> )                                                                 | [17]      |
| Gammaproteobacteria   | <i>Pseudoalteromonas elyakovii</i>    | macroalga                                                                                                        | [5]       |
| Gammaproteobacteria   | <i>Pseudoalteromonas espejiana</i>    | jellyfish ( <i>Aurelia aurita</i> )                                                                              | [18]      |
| Gammaproteobacteria   | <i>Pseudoalteromonas marina</i>       | red algae ( <i>Pyropia yezoensis</i> )                                                                           | [19]      |
| Gammaproteobacteria   | <i>Pseudoalteromonas nigrifaciens</i> | sea cucumber ( <i>Apostichopus japonicus</i> )                                                                   | [20]      |
| Gammaproteobacteria   | <i>Pseudoalteromonas tetraodonis</i>  | fish                                                                                                             | [21-23]   |
| Gammaproteobacteria   | <i>Shewanella baltica</i>             | fish ( <i>Danio rerio</i> )                                                                                      | [24]      |
| Gammaproteobacteria   | <i>Vibrio aestuarianus</i>            | oyster                                                                                                           | [25]      |
| Gammaproteobacteria   | <i>Vibrio alfacensis</i>              | fish                                                                                                             | [26]      |
| Gammaproteobacteria   | <i>Vibrio brasiliensis</i>            | shrimp ( <i>Litopenaeus vannamei</i> )                                                                           | [27, 28]  |
| Gammaproteobacteria   | <i>Vibrio campbellii</i>              | shrimp ( <i>Litopenaeus vannamei</i> )                                                                           | [29]      |
| Gammaproteobacteria   | <i>Vibrio chagasii</i>                | oyster ( <i>Crassostrea gigas</i> ), fish (salmonids)                                                            | [30, 31]  |
| Gammaproteobacteria   | <i>Vibrio crassostreae</i>            | oyster                                                                                                           | [32]      |
| Gammaproteobacteria   | <i>Vibrio diabolicus</i>              | clam ( <i>Gomphina aequilatera</i> )                                                                             | [33]      |
| Gammaproteobacteria   | <i>Vibrio fluvialis</i>               | Human                                                                                                            | [34]      |
| Gammaproteobacteria   | <i>Vibrio fortis</i>                  | fish (seahorses)                                                                                                 | [35]      |
| Gammaproteobacteria   | <i>Vibrio gigantis</i>                | human, oyster ( <i>Crassostrea gigas</i> )                                                                       | [36]      |
| Gammaproteobacteria   | <i>Vibrio harveyi</i>                 | fish ( <i>Seriola lalandi</i> and <i>S. dumerili</i> )                                                           | [37]      |
| Gammaproteobacteria   | <i>Vibrio jasicida</i>                | moth ( <i>Galleria mellonella</i> )                                                                              | [38]      |
| Gammaproteobacteria   | <i>Vibrio kanaloae</i>                | lobster ( <i>Jasus verreauxi</i> )                                                                               | [39]      |
| Gammaproteobacteria   | <i>Vibrio lentus</i>                  | clam ( <i>Scapharca broughtonii</i> ), fish ( <i>Dicentrarchus labrax</i> ), octopus ( <i>Octopus vulgaris</i> ) | [40, 41]  |
| Gammaproteobacteria   | <i>Vibrio mediterranei</i>            | mussel ( <i>Pinna nobilis</i> ), manila clams, brine shrimp                                                      | [42, 43]  |
| Gammaproteobacteria   | <i>Vibrio nereis</i>                  | shrimp                                                                                                           | [44]      |
| Gammaproteobacteria   | <i>Vibrio ordalii</i>                 | fish (salmonids)                                                                                                 | [45]      |
| Gammaproteobacteria   | <i>Vibrio owensii</i>                 | coral                                                                                                            | [46]      |
| Gammaproteobacteria   | <i>Vibrio pelagius</i>                | fish ( <i>Scophthalmus maximus</i> )                                                                             | [47]      |
| Gammaproteobacteria   | <i>Vibrio pomeroyi</i>                | clams                                                                                                            | [48]      |

|                     |                             |                                        |          |
|---------------------|-----------------------------|----------------------------------------|----------|
| Gammaproteobacteria | <i>Vibrio proteolyticus</i> | shrimp ( <i>Artemia</i> spp.), human   | [49, 50] |
| Gammaproteobacteria | <i>Vibrio sagamiensis</i>   | fish (turbot, sole)                    | [51]     |
| Gammaproteobacteria | <i>Vibrio scophthalmi</i>   | fish ( <i>Paralichthys olivaceus</i> ) | [52]     |
| Gammaproteobacteria | <i>Vibrio splendidus</i>    | oyster ( <i>Crassostrea gigas</i> )    | [53, 54] |
| Gammaproteobacteria | <i>Vibrio tapetis</i>       | clams                                  | [48]     |
| Gammaproteobacteria | <i>Vibrio tasmaniensis</i>  | oyster                                 | [55]     |
| Gammaproteobacteria | <i>Vibrio vulnificus</i>    | human                                  | [56]     |
| Gammaproteobacteria | <i>Vibrio xuii</i>          | fish (turbot, sole)                    | [14]     |

## Selected References

1. Yang, M.; Wang, Q.; Chen, J.; Wu, H., The occurrence of potential pathogenic bacteria on international ships' ballast water at Yangshan Port, Shanghai, China. *Marine Pollution Bulletin* **2022**, 184, 114190.
2. Houf, K.; Stephan, R., Isolation and characterization of the emerging foodborn pathogen *Arcobacter* from human stool. *Journal of Microbiological Methods* **2007**, 68, (2), 408-413.
3. Johnson, L. G.; Murano, E. A., *Arcobacter* isolates from various sources. *Journal of food protection* **2002**, 65, (11), 1789-1795.
4. Levican, A.; Alkeskas, A.; Günter, C.; Forsythe, S. J.; Figueras, M. J., Adherence to and invasion of human intestinal cells by *Arcobacter* species and their virulence genotypes. *Applied and environmental microbiology* **2013**, 79, (16), 4951-4957.
5. Goecke, F.; Labes, A.; Wiese, J.; Imhoff, J. F., Phylogenetic analysis and antibiotic activity of bacteria isolated from the surface of two co-occurring macroalgae from the Baltic Sea. *European journal of phycology* **2013**, 48, (1), 47-60.
6. Pineiro-Vidal, M.; Riaza, A.; Santos, Y., *Tenacibaculum discolor* sp. nov. and *Tenacibaculum gallaicum* sp. nov., isolated from sole (*Solea senegalensis*) and turbot (*Psetta maxima*) culture systems. *International journal of systematic and evolutionary microbiology* **2008**, 58, (1), 21-25.
7. Fernández-Álvarez, C.; Santos, Y., Phenotypic and Molecular Characterization of *Lacinutrix venerupis* Isolated from Atlantic Horse Mackerel *Trachurus trachurus*. *Journal of Aquatic Animal Health* **2019**, 31, (4), 320-327.
8. Kozińska, A.; Paździor, E.; Pękala, A.; Niemczuk, W., *Acinetobacter johnsonii* and *Acinetobacter lwoffii*-the emerging fish pathogens. *Journal of Veterinary Research* **2014**, 58, (2), 193-199.
9. Seifert, H.; Strate, A.; Schulze, A.; Pulverer, G., Vascular Catheter—Related Bloodstream Infection Due to *Acinetobacter johnsonii* (Formerly *Acinetobacter calcoaceticus* var. *lwoffii*): Report of 13 Cases. *Clinical Infectious Diseases* **1993**, 17, (4), 632-636.
10. Manan, H.; Rosland, N. A.; Mat Deris, Z.; Che Hashim, N. F.; Kasan, N. A.; Ikhwanuddin, M.; Suloma, A.; Fauzan, F., 16S rRNA sequences of *Exiguobacterium* spp. bacteria dominant in a biofloc pond cultured with whiteleg shrimp, *Penaeus vannamei*. *Aquaculture Research* **2022**, 53, (5), 2029-2041.
11. Jalali, S.; Kohli, S.; Latka, C.; Bhatia, S.; Vellarikal, S. K.; Sivasubbu, S.; Scaria, V.; Ramachandran, S., Screening currency notes for microbial pathogens and antibiotic resistance genes using a shotgun metagenomic approach. *PLoS One* **2015**, 10, (6), e0128711.
12. Kazar, J., *Coxiella burnetii* infection. *Annals of the New York Academy of Sciences* **2005**, 1063, (1), 105-114.
13. Løvoll, M.; Wiik-Nielsen, C.; Tunsjø, H. S.; Colquhoun, D.; Lunder, T.; Sørum, H.; Grove, S., Atlantic salmon bath challenged with *Moritella viscosa*—pathogen invasion and host response. *Fish & shellfish immunology* **2009**, 26, (6), 877-884.
14. Martins, P.; Cleary, D. F.; Pires, A. C.; Rodrigues, A. M.; Quintino, V.; Calado, R.; Gomes, N. C., Molecular analysis of bacterial communities and detection of potential pathogens in a recirculating aquaculture system for *Scophthalmus maximus* and *Solea senegalensis*. *PLoS one* **2013**, 8, (11), e80847.
15. Urbanczyk, H.; Ogura, Y.; Hendry, T. A.; Gould, A. L.; Kiwaki, N.; Atkinson, J. T.; Hayashi, T.; Dunlap, P. V., Genome sequence of *Photobacterium mandapamensis* strain svers. 1.1, the bioluminescent symbiont of the cardinal fish *Siphamia versicolor*. In *Am Soc Microbiol*: 2011.
16. Fichi, G.; Cardeti, G.; Perrucci, S.; Vanni, A.; Cersini, A.; Lenzi, C.; De Wolf, T.; Fronte, B.; Guarducci, M.; Susini, F., Skin lesion-associated pathogens from *Octopus vulgaris*: first detection of *Photobacterium swingsii*, *Lactococcus garvieae* and betanodavirus. *Diseases of Aquatic Organisms* **2015**, 115, (2), 147-156.
17. Li, J.; Weinberger, F.; Saha, M.; Majzoub, M. E.; Egan, S., Cross-host protection of marine bacteria against macroalgal disease. *Microbial ecology* **2022**, 84, (4), 1288-1293.
18. Weiland-Bräuer, N.; Pinnow, N.; Langfeldt, D.; Roik, A.; Güllert, S.; Chibani, C. M.; Reusch, T. B.; Schmitz, R. A., The native microbiome is crucial for offspring generation and fitness of *Aurelia aurita*. *MBio* **2020**, 11, (6), 10.1128/mbio. 02336-20.
19. Li, J.; Mou, Z.; Yang, H.; Mao, Y.; Yan, Y.; Mo, Z., Isolation and identification the pathogen of *Pyropia yezoensis* green spot disease. *Progress in Fishery Science* **2018**.
20. Wang, Y., Etiology of skin ulcer syndrome in cultured juveniles of *Apostichopus japonicus* and analysis of reservoir of the pathogens. *Journal of Fishery Sciences of China/Zhongguo Shuichan Kexue* **2006**, 13, (4).



21. Simidu, U.; Kita-Tsukamoto, K.; Yasumoto, T.; Yotsu, M., Taxonomy of four marine bacterial strains that produce tetrodotoxin. *International journal of systematic and evolutionary microbiology* **1990**, 40, (4), 331-336.
22. Ivanova, E. P.; Romanenko, L. A.; Matte, M. H.; Matte, G. R.; Lysenko, A. M.; Simidu, U.; Kita-Tsukamoto, K.; Sawabe, T.; Vysotskii, M. V.; Frolova, G. M., Retrieval of the species *Alteromonas tetraodonis* Simidu et al. 1990 as *Pseudoalteromonas tetraodonis* comb. nov. and emendation of description. *International journal of systematic and evolutionary microbiology* **2001**, 51, (3), 1071-1078.
23. Liu, H.; Zheng, F.; Sun, X.; Hong, X.; Dong, S.; Wang, B.; Tang, X.; Wang, Y., Identification of the pathogens associated with skin ulceration and peristome tumescence in cultured sea cucumbers *Apostichopus japonicus* (Selenka). *Journal of Invertebrate Pathology* **2010**, 105, (3), 236-242.
24. Topić Popović, N.; Kazazić, S.; Bilić, B.; Babić, S.; Bojanić, K.; Bujak, M.; Tartaro Bujak, I.; Jadan, M.; Strunjak-Perović, I.; Kepec, S., *Shewanella* spp. from wastewater treatment plant-affected environment: isolation and characterization. *Environmental Science and Pollution Research* **2022**, 29, (55), 82986-83003.
25. Labreuche, Y.; Lambert, C.; Soudant, P.; Boulo, V.; Huvet, A.; Nicolas, J.-L., Cellular and molecular hemocyte responses of the Pacific oyster, *Crassostrea gigas*, following bacterial infection with *Vibrio aestuarianus* strain 01/32. *Microbes and Infection* **2006**, 8, (12-13), 2715-2724.
26. Costa, J. C. C. P.; Floriano, B.; Villegas, I. M. B.; Rodríguez-Ruiz, J. P.; Posada-Izquierdo, G. D.; Zurera, G.; Pérez-Rodríguez, F., Study of the microbiological quality, prevalence of foodborne pathogens and product shelf-life of Gilthead sea bream (*Sparus aurata*) and Sea bass (*Dicentrarchus labrax*) from aquaculture in estuarine ecosystems of Andalusia (Spain). *Food microbiology* **2020**, 90, 103498.
27. Li, S.-Y.; Huang, Y.-E.; Chen, J.-Y.; Lai, C.-H.; Mao, Y.-C.; Huang, Y.-T.; Liu, P.-Y., Genomics of *Ochrobactrum pseudogrignone* (newly named *Brucella pseudogrignone*) reveals a new bla OXA subgroup. *Microbial Genomics* **2021**, 7, (8).
28. Li, S.; Wang, S.; Xie, L.; Liu, Y.; Chen, H.; Feng, J.; Ouyang, L., Identification and optimization of the algicidal activity of a novel marine bacterium against *Akashiwo sanguinea*. *Frontiers in Marine Science* **2022**, 9, 798544.
29. Wang, L.; Chen, Y.; Huang, H.; Huang, Z.; Chen, H.; Shao, Z., Isolation and identification of *Vibrio campbellii* as a bacterial pathogen for luminous vibriosis of *Litopenaeus vannamei*. *Aquaculture Research* **2015**, 46, (2), 395-404.
30. Austin, B.; Austin, D.; Sutherland, R.; Thompson, F.; Swings, J., Pathogenicity of vibrios to rainbow trout (*Oncorhynchus mykiss*, Walbaum) and *Artemia nauplii*. *Environmental microbiology* **2005**, 7, (9), 1488-1495.
31. Pérez-Cataluña, A.; Lucena, T.; Tarazona, E.; Arahall, D. R.; Macián, M. C.; Pujalte, M. J., An MLSA approach for the taxonomic update of the *Splendidus* clade, a lineage containing several fish and shellfish pathogenic *Vibrio* spp. *Systematic and applied microbiology* **2016**, 39, (6), 361-369.
32. Bruto, M.; James, A.; Petton, B.; Labreuche, Y.; Chenivesse, S.; Alunno-Bruscia, M.; Polz, M. F.; Le Roux, F., *Vibrio crassostreae*, a benign oyster colonizer turned into a pathogen after plasmid acquisition. *The ISME journal* **2017**, 11, (4), 1043-1052.
33. Song, J.; Liu, X.; Wu, C.; Zhang, Y.; Fan, K.; Zhang, X.; Wei, Y., Isolation, identification and pathogenesis study of *Vibrio diabolus*. *Aquaculture* **2021**, 533, 736043.
34. Ramamurthy, T.; Chowdhury, G.; Pazhani, G. P.; Shinoda, S., *Vibrio fluvialis*: an emerging human pathogen. *Frontiers in microbiology* **2014**, 5, 91.
35. Wang, X.; Zhang, Y.; Qin, G.; Luo, W.; Lin, Q., A novel pathogenic bacteria (*Vibrio fortis*) causing enteritis in cultured seahorses, *Hippocampus erectus* Perry, 1810. *Journal of Fish Diseases* **2016**, 39, (6), 765-769.
36. Roux, F. L.; Goubet, A.; Thompson, F.; Faury, N.; Gay, M.; Swings, J.; Saulnier, D., *Vibrio gigantis* sp. nov., isolated from the haemolymph of cultured oysters (*Crassostrea gigas*). *International Journal of Systematic and Evolutionary Microbiology* **2005**, 55, (6), 2251-2255.
37. Sicuro, B.; Luzzana, U., The state of *Seriola* spp. other than yellowtail (*S. quinqueradiata*) farming in the world. *Reviews in Fisheries Science & Aquaculture* **2016**, 24, (4), 314-325.
38. Harrison, J.; Nelson, K.; Morcrette, H.; Morcrette, C.; Preston, J.; Helmer, L.; Titball, R. W.; Butler, C. S.; Wagley, S., The increased prevalence of *Vibrio* species and the first reporting of *Vibrio jasicida* and *Vibrio rotiferianus* at UK shellfish sites. *Water Research* **2022**, 211, 117942.
39. Huang, B.; Zhang, X.; Wang, C.; Bai, C.; Li, C.; Li, C.; Xin, L., Isolation and characterization of *Vibrio kanaloae* as a major pathogen associated with mass mortalities of Ark Clam, *Scapharca broughtonii*, in cold season.

- Microorganisms* **2021**, *9*, (10), 2161.
40. Schaeck, M.; Duchateau, L.; Van Den Broeck, W.; Van Trappen, S.; De Vos, P.; Coulombet, C.; Boon, N.; Haesebrouck, F.; Decostere, A., *Vibrio lentus* protects gnotobiotic sea bass (*Dicentrarchus labrax* L.) larvae against challenge with *Vibrio harveyi*. *Veterinary microbiology* **2016**, *185*, 41-48.
  41. Farto, R.; Armada, S.; Montes, M.; Guisande, J.; Pérez, M.; Nieto, T., *Vibrio lentus* associated with diseased wild octopus (*Octopus vulgaris*). *Journal of Invertebrate Pathology* **2003**, *83*, (2), 149-156.
  42. Andree, K. B.; Carrasco, N.; Carella, F.; Furones, D.; Prado, P., *Vibrio mediterranei*, a potential emerging pathogen of marine fauna: investigation of pathogenicity using a bacterial challenge in *Pinna nobilis* and development of a species-specific PCR. *Journal of applied microbiology* **2021**, *130*, (2), 617-631.
  43. Torres, M.; Reina, J. C.; Fuentes-Monteverde, J. C.; Fernández, G.; Rodríguez, J.; Jiménez, C.; Llamas, I., AHL-lactonase expression in three marine emerging pathogenic *Vibrio* spp. reduces virulence and mortality in brine shrimp (*Artemia salina*) and Manila clam (*Venerupis philippinarum*). *PLoS one* **2018**, *13*, (4), e0195176.
  44. Mondal, S. K.; Lijon, B.; Reza, R.; Ishika, T., Isolation and identification of *Vibrio nereis* and *Vibrio harveyi* in farm raised *Penaeus monodon* marine shrimp. *Int J Biosci* **2016**, *8*, 55-61.
  45. Ruiz, P.; Balado, M.; Fuentes-Monteverde, J. C.; Toranzo, A. E.; Rodríguez, J.; Jiménez, C.; Avendaño-Herrera, R.; Lemos, M. L., The fish pathogen *Vibrio ordalii* under iron deprivation produces the siderophore piscibactin. *Microorganisms* **2019**, *7*, (9), 313.
  46. Amin, A. R.; Feng, G.; Al-Saari, N.; Meirelles, P. M.; Yamazaki, Y.; Mino, S.; Thompson, F. L.; Sawabe, T.; Sawabe, T., The first temporal and spatial assessment of *Vibrio* diversity of the surrounding seawater of coral reefs in Ishigaki, Japan. *Frontiers in microbiology* **2016**, *7*, 1185.
  47. Villamil, L.; Figueras, A.; Aranguren, R.; Novoa, B., Non-specific immune response of turbot, *Scophthalmus maximus* (L.), experimentally infected with a pathogenic *Vibrio pelagius*. *Journal of fish diseases* **2003**, *26*, (6), 321-329.
  48. Guisande, J. A.; Lago, E. P.; Prado, S.; Nieto, T. P.; Seguí, R. F., Genotypic diversity of culturable *Vibrio* species associated with the culture of oysters and clams in Galicia and screening of their pathogenic potential. *Journal of Shellfish Research* **2008**, *27*, (4), 801-809.
  49. Verschuere, L.; Heang, H.; Criel, G.; Sorgeloos, P.; Verstraete, W., Selected bacterial strains protect *Artemia* spp. from the pathogenic effects of *Vibrio proteolyticus* CW8T2. *Applied and Environmental Microbiology* **2000**, *66*, (3), 1139-1146.
  50. Ray, A.; Kinch, L. N.; de Souza Santos, M.; Grishin, N. V.; Orth, K.; Salomon, D., Proteomics analysis reveals previously uncharacterized virulence factors in *Vibrio proteolyticus*. *MBio* **2016**, *7*, (4), 10.1128/mbio.01077-16.
  51. Gökbülak, F., Effect of American bison (*Bison bison* L.) on the recovery and germinability of seeds of range forage species. *Grass and Forage Science* **2002**, *57*, (4), 395-400.
  52. Qiao, G.; Jang, I.-K.; Won, K. M.; Woo, S. H.; Xu, D.-H.; Park, S. I., Pathogenicity comparison of high-and low-virulence strains of *Vibrio scophthalmi* in olive flounder *Paralichthys olivaceus*. *Fisheries science* **2013**, *79*, 99-109.
  53. Duperthuy, M.; Schmitt, P.; Garzón, E.; Caro, A.; Rosa, R. D.; Le Roux, F.; Lautrédou-Audouy, N.; Got, P.; Romestand, B.; De Lorgeril, J., Use of OmpU porins for attachment and invasion of *Crassostrea gigas* immune cells by the oyster pathogen *Vibrio splendidus*. *Proceedings of the National Academy of Sciences* **2011**, *108*, (7), 2993-2998.
  54. Kesarcodi-Watson, A.; Kaspar, H.; Lategan, M.; Gibson, L., Two pathogens of Greenshell™ mussel larvae, *Perna canaliculus*: *Vibrio splendidus* and a *V. coralliilyticus*/neptunius-like isolate. *Journal of fish diseases* **2009**, *32*, (6), 499-507.
  55. Robino, E.; Poirier, A. C.; Amraoui, H.; Le Bissonnais, S.; Perret, A.; Lopez-Joven, C.; Auguet, J. C.; Rubio, T. P.; Cazevielle, C.; Rolland, J. L., Resistance of the oyster pathogen *Vibrio tasmaniensis* LGP32 against grazing by *Vannella* sp. marine amoeba involves Vsm and CopA virulence factors. *Environmental Microbiology* **2020**, *22*, (10), 4183-4197.
  56. Ho, H. T.; Lipman, L. J.; Gastra, W., Arcobacter, what is known and unknown about a potential foodborne zoonotic agent! *Veterinary microbiology* **2006**, *115*, (1-3), 1-13.
